# Supplementary material for: Comparative Genomic Analysis of Novel Bifidobacterium longum subsp. longum Strains Reveals Functional Divergence in the Human Gut Microbiota
Source: MDPI journal article supplement (doi:10.3390/microorganisms9091906), 2021-09-08
Supplement: s1 [file s1]

Table S1: Virulence factor-associated genes found in Chilean isolates.

| Isolate | Gene name | Associated VF | VFDB id | VF origin                 | Percent identity (%) |
|---------|-----------|---------------|---------|---------------------------|----------------------|
| D4      | tufA      | EF-Tu         | VF0460  | Francisella tularensis    | 68.67                |
| D4      | wbtL      | LPS           | VF0542  | Francisella tularensis    | 62.33                |
| D4      | wbtL      | LPS           | VF0542  | Francisella tularensis    | 64.36                |
| D4      | wbtL      | LPS           | VF0542  | Francisella tularensis    | 64.71                |
| D4      | ugd       | Capsule       | VF0560  | Klebsiella pneumoniae     | 61.59                |
| D4      | ugd       | Capsule       | VF0560  | Klebsiella pneumoniae     | 62.68                |
| D4      | flhA      | Flagella      | VF0394  | Yersinia enterocolitica   | 85.42                |
| D4      | flhB      | Flagella      | VF0394  | Yersinia enterocolitica   | 72.00                |
| D4      | flhB      | Flagella      | VF0430  | Burkholderia pseudomallei | 63.83                |
| D4      | yagV/ecpE | ECP           | VF0404  | Escherichia coli (EHEC)   | 96.12                |
| E1      | tufA      | EF-Tu         | VF0460  | Francisella tularensis    | 68.67                |
| M12     | tufA      | EF-Tu         | VF0460  | Francisella tularensis    | 68.67                |
| M12     | ugd       | Capsule       | VF0560  | Klebsiella pneumoniae     | 61.59                |
| S3      | tufA      | EF-Tu         | VF0460  | Francisella tularensis    | 68.67                |
| S3      | wbtL      | LPS           | VF0542  | Francisella tularensis    | 64.36                |
| S3      | ugd       | Capsule       | VF0560  | Klebsiella pneumoniae     | 62.68                |

Table S2: Antibiotic resistance genes found in Chilean isolates.

| Isolate | Gene | Drug Class               | AMR Gene Family                                           | Percent identity (%) |
|---------|------|--------------------------|-----------------------------------------------------------|----------------------|
| D4      | rpoB | rifamycin antibiotic     | rifamycin-resistant beta-subunit of RNA polymerase (rpoB) | 92.57                |
| E1      | ErmX | macrolide antibiotic     | Erm 23S ribosomal RNA methyltransferase                   | 90.14                |
| E1      | ErmX | lincosamide antibiotic   | Erm 23S ribosomal RNA methyltransferase                   | 90.14                |
| E1      | ErmX | streptogramin antibiotic | Erm 23S ribosomal RNA methyltransferase                   | 90.14                |
| E1      | rpoB | rifamycin antibiotic     | rifamycin-resistant beta-subunit of RNA polymerase (rpoB) | 92.57                |
| M12     | rpoB | rifamycin antibiotic     | rifamycin-resistant beta-subunit of RNA polymerase (rpoB) | 92.57                |
| S3      | rpoB | rifamycin antibiotic     | rifamycin-resistant beta-subunit of RNA polymerase (rpoB) | 92.57                |
